# Supplementary material
Source: publisher figshare collection journal article supplement (https://gsajournals.figshare.com/articles/dataset/_/6143243)

# Supplementary file S3

Principal components plot of the first two eigenvectors of the relationship matrix used in the prediction model.


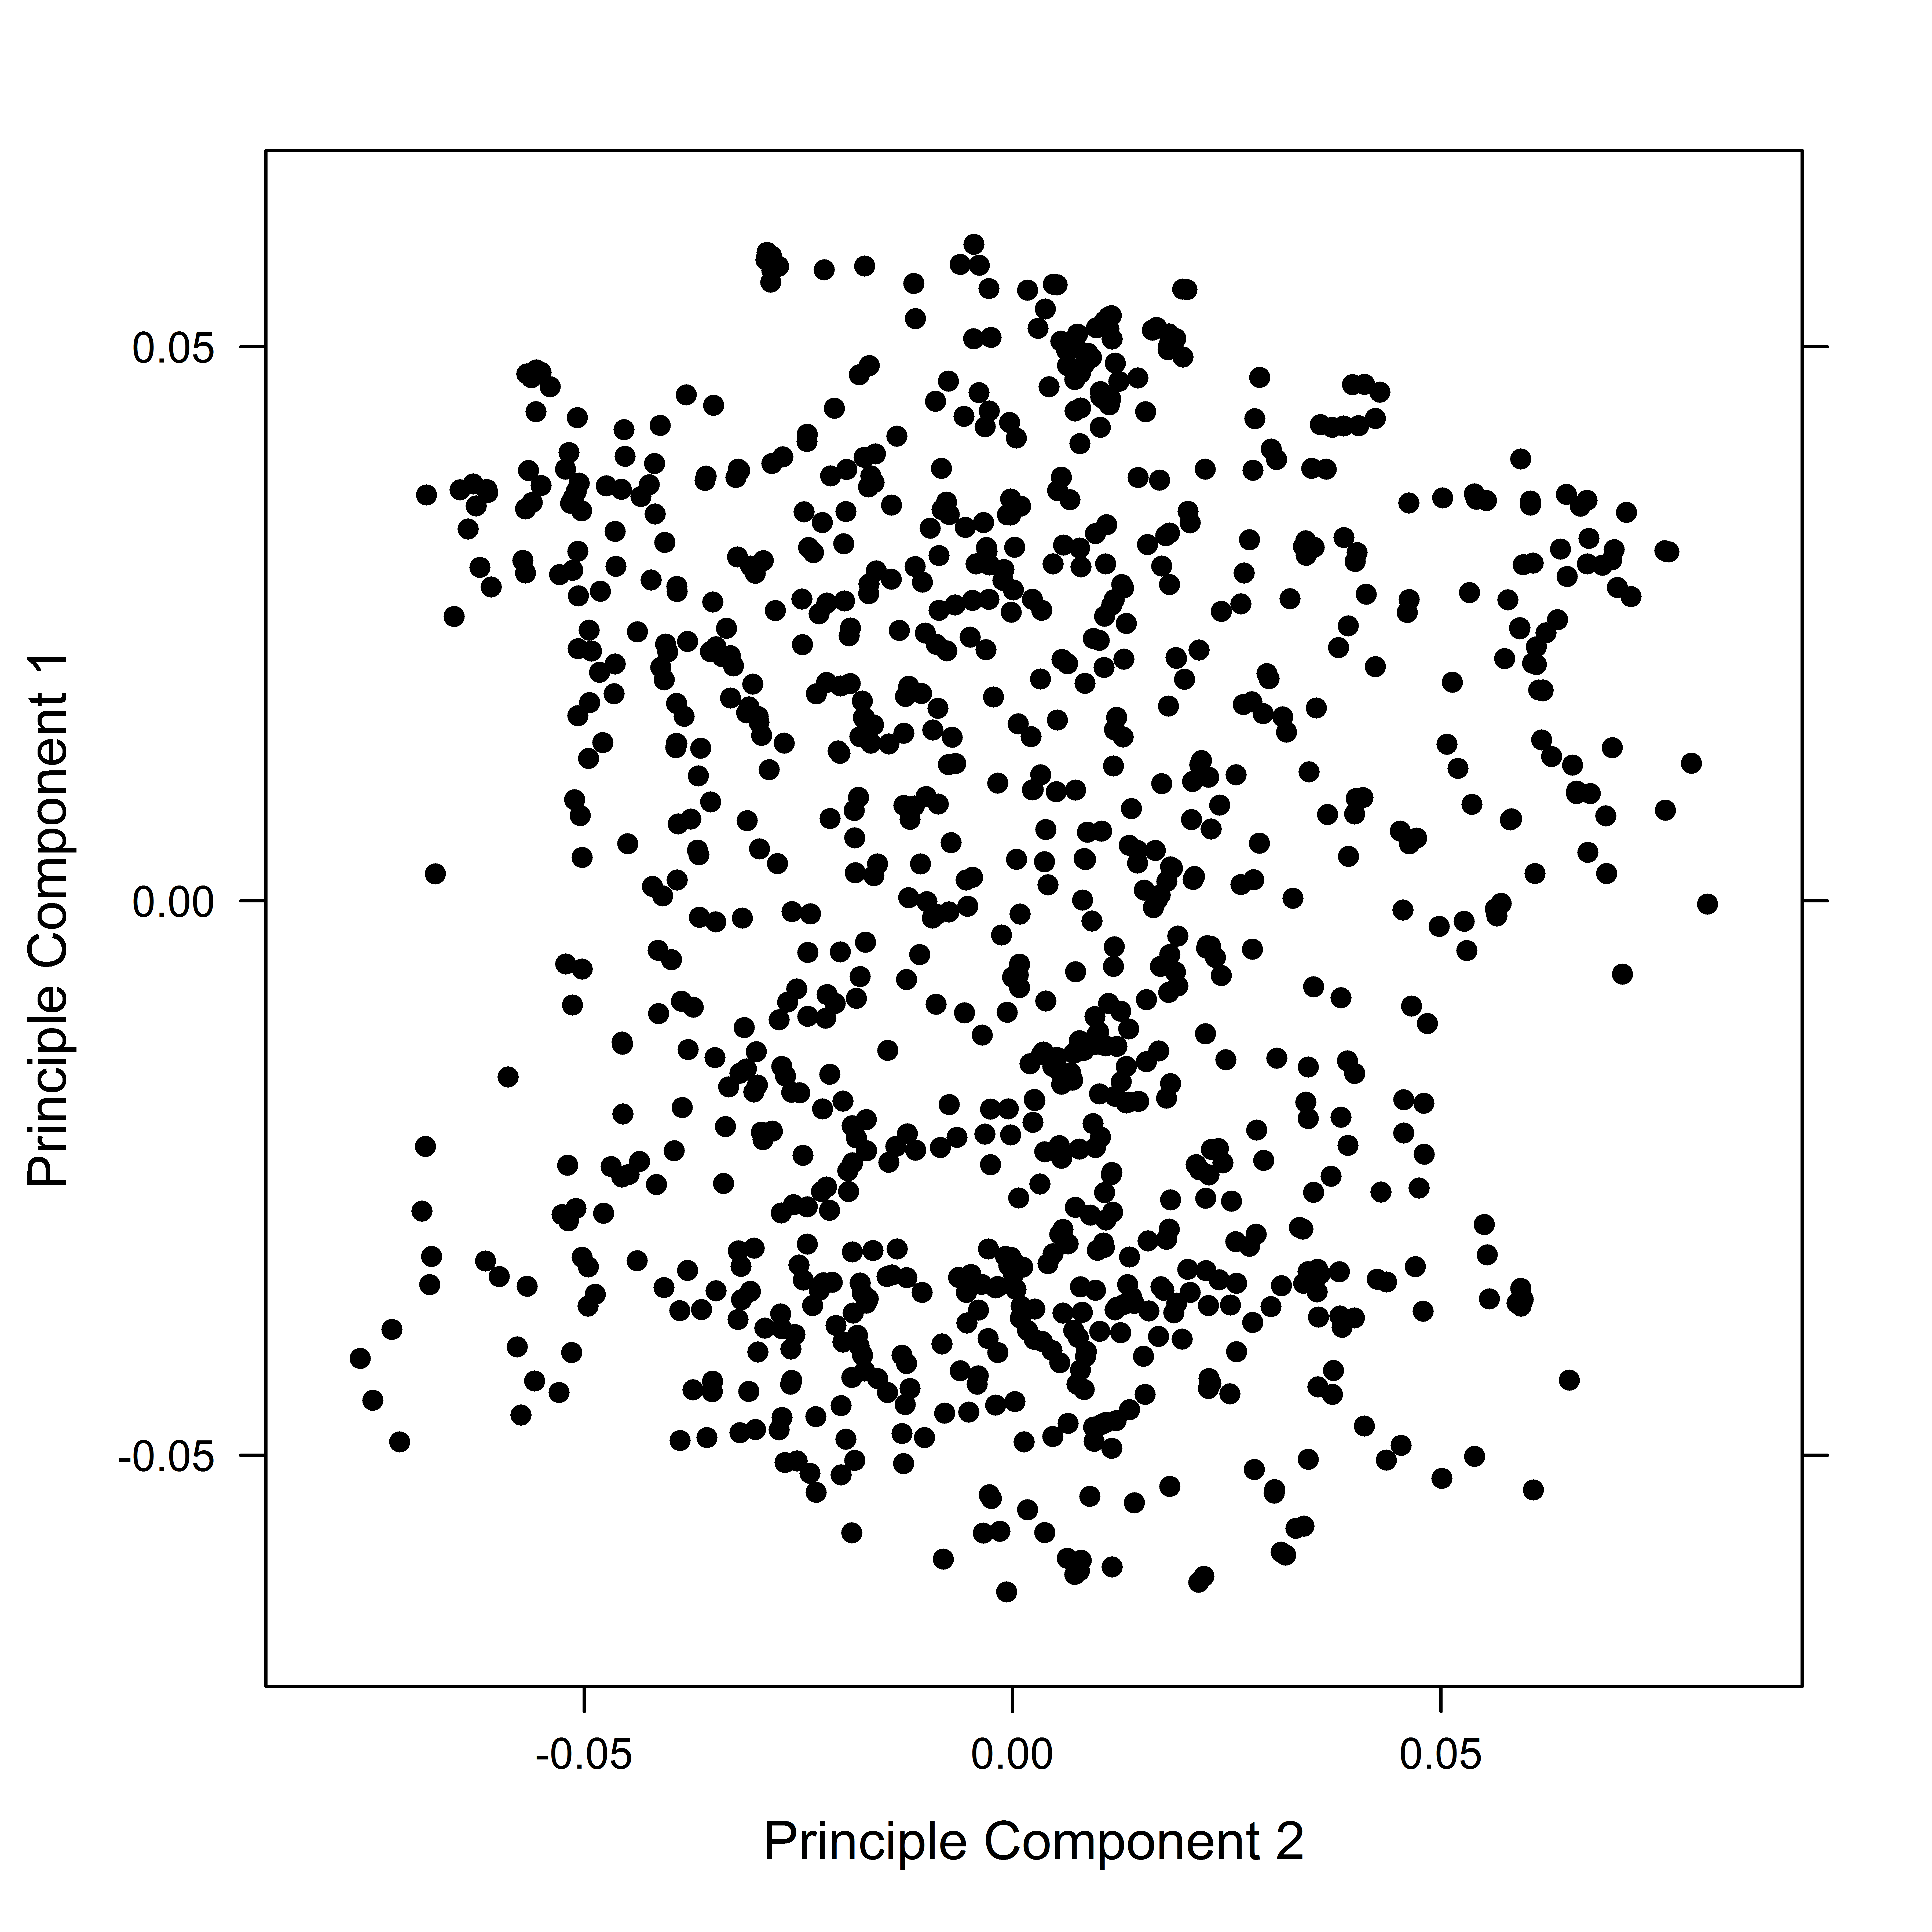

Supplement: Supplementary file 1 [file 1]
